# Supplementary material for: The spike protein of SARS-CoV-2 induces inflammation and EMT of lung epithelial cells and fibroblasts through the upregulation of GADD45A
Source: Open Med (Wars). 2023 Nov 15;18(1):20230779. doi: 10.1515/med-2023-0779 (PMC10656760; doi:10.1515/med-2023-0779)
Supplement: Supplementary Table S1 [file Table-S1.xlsx]

## Sheet: Sheet1
Table S1 Genes enriched in top 30 GO Terms
GO_ID	GO_term	TYPE	diff_gene_in_this_GO	UP_GENE	DOWN_GENE	all_diff_gene_in_all_GO	all_gene_in_this_GO	all_gene_in_all_GO	gene_UP_list	gene_DOWN_list	rich_factor	Pvalue	Qvalue
GO:0031721	hemoglobin alpha binding	molecular_function	4	0	4	1581	5	22747	-	ENSG00000213931(HBE1),ENSG00000213934(HBG1),ENSG00000223609(HBD),ENSG00000196565(HBG2),	11.5102	0.000442657	0.0684177
GO:0016907	G protein-coupled acetylcholine receptor activity	molecular_function	4	2	2	1581	7	22747	ENSG00000184984(CHRM5),ENSG00000134489(HRH4),	ENSG00000168539(CHRM1),ENSG00000180720(CHRM4),	8.22156	0.00124592	0.123332
GO:0030492	hemoglobin binding	molecular_function	5	1	4	1581	9	22747	ENSG00000257017(HP),	ENSG00000196565(HBG2),ENSG00000213931(HBE1),ENSG00000223609(HBD),ENSG00000213934(HBG1),	7.99318	0.000451363	0.0685606
GO:0007197	adenylate cyclase-inhibiting G protein-coupled acetylcholine receptor signaling pathway	biological_process	4	2	2	1581	8	22747	ENSG00000134489(HRH4),ENSG00000184984(CHRM5),	ENSG00000168539(CHRM1),ENSG00000180720(CHRM4),	7.19386	0.00191627	0.159268
GO:0031838	haptoglobin-hemoglobin complex	cellular_component	5	1	4	1581	11	22747	ENSG00000257017(HP),	ENSG00000196565(HBG2),ENSG00000213931(HBE1),ENSG00000223609(HBD),ENSG00000213934(HBG1),	6.53988	0.000996658	0.10579
GO:0036414	histone citrullination	biological_process	4	2	2	1581	9	22747	ENSG00000142619(PADI3),ENSG00000159339(PADI4),	ENSG00000142623(PADI1),ENSG00000117115(PADI2),	6.39455	0.00282164	0.19122
GO:0018101	protein citrullination	biological_process	4	2	2	1581	9	22747	ENSG00000142619(PADI3),ENSG00000159339(PADI4),	ENSG00000117115(PADI2),ENSG00000142623(PADI1),	6.39455	0.00282164	0.19122
GO:0004668	protein-arginine deiminase activity	molecular_function	4	2	2	1581	9	22747	ENSG00000159339(PADI4),ENSG00000142619(PADI3),	ENSG00000117115(PADI2),ENSG00000142623(PADI1),	6.39455	0.00282164	0.19122
GO:0048631	regulation of skeletal muscle tissue growth	biological_process	4	2	2	1581	9	22747	ENSG00000138379(MSTN),ENSG00000095587(TLL2),	ENSG00000248746(ACTN3),ENSG00000167244(IGF2),	6.39455	0.00282164	0.19122
GO:0004745	NAD-retinol dehydrogenase activity	molecular_function	8	2	6	1581	20	22747	ENSG00000125845(BMP2),ENSG00000139988(RDH12),	ENSG00000139547(RDH16),ENSG00000196139(AKR1C3),ENSG00000187758(ADH1A),ENSG00000162496(DHRS3),ENSG00000196616(ADH1B),ENSG00000248144(ADH1C),	5.75509	0.000125033	0.0314727
GO:0031720	haptoglobin binding	molecular_function	4	0	4	1581	10	22747	-	ENSG00000213934(HBG1),ENSG00000223609(HBD),ENSG00000213931(HBE1),ENSG00000196565(HBG2),	5.75509	0.00400677	0.229219
GO:0015250	water channel activity	molecular_function	5	0	5	1581	13	22747	-	ENSG00000167580(AQP2),ENSG00000161798(AQP5),ENSG00000135517(MIP),ENSG00000165272(AQP3),ENSG00000165269(AQP7),	5.53374	0.00195178	0.160703
GO:0070700	BMP receptor binding	molecular_function	5	2	3	1581	13	22747	ENSG00000125845(BMP2),ENSG00000130513(GDF15),	ENSG00000164659(ELAPOR2),ENSG00000153162(BMP6),ENSG00000116985(BMP8B),	5.53374	0.00195178	0.160703
GO:0031680	G-protein beta/gamma-subunit complex	cellular_component	5	3	2	1581	13	22747	ENSG00000186469(GNG2),ENSG00000283980(GNG14),ENSG00000167414(GNG8),	ENSG00000176533(GNG7),ENSG00000168243(GNG4),	5.53374	0.00195178	0.160703
GO:0045741	positive regulation of epidermal growth factor-activated receptor activity	biological_process	5	3	2	1581	13	22747	ENSG00000113070(HBEGF),ENSG00000163235(TGFA),ENSG00000138798(EGF),	ENSG00000109321(AREG),ENSG00000107954(NEURL1),	5.53374	0.00195178	0.160703
GO:0005833	hemoglobin complex	cellular_component	5	0	5	1581	13	22747	-	ENSG00000196565(HBG2),ENSG00000213931(HBE1),ENSG00000284931(AC104389.6),ENSG00000213934(HBG1),ENSG00000223609(HBD),	5.53374	0.00195178	0.160703
GO:0048630	skeletal muscle tissue growth	biological_process	4	2	2	1581	11	22747	ENSG00000138379(MSTN),ENSG00000095587(TLL2),	ENSG00000248746(ACTN3),ENSG00000167244(IGF2),	5.2319	0.00551785	0.265641
GO:0014049	positive regulation of glutamate secretion	biological_process	4	1	3	1581	11	22747	ENSG00000187094(CCK),	ENSG00000101188(NTSR1),ENSG00000117009(KMO),ENSG00000128271(ADORA2A),	5.2319	0.00551785	0.265641
GO:0047555	3',5'-cyclic-GMP phosphodiesterase activity	molecular_function	5	3	2	1581	14	22747	ENSG00000186642(PDE2A),ENSG00000095464(PDE6C),ENSG00000185527(PDE6G),	ENSG00000160191(PDE9A),ENSG00000132915(PDE6A),	5.13847	0.00263559	0.184282
GO:0005344	oxygen carrier activity	molecular_function	5	0	5	1581	15	22747	-	ENSG00000284931(AC104389.6),ENSG00000223609(HBD),ENSG00000213934(HBG1),ENSG00000196565(HBG2),ENSG00000213931(HBE1),	4.79591	0.00348809	0.207635
GO:0002430	complement receptor mediated signaling pathway	biological_process	4	2	2	1581	12	22747	ENSG00000171051(FPR1),ENSG00000171860(C3AR1),	ENSG00000112293(GPLD1),ENSG00000134830(C5AR2),	4.79591	0.00740167	0.295062
GO:0007614	short-term memory	biological_process	4	1	3	1581	12	22747	ENSG00000111249(CUX2),	ENSG00000174576(NPAS4),ENSG00000181856(SLC2A4),ENSG00000132386(SERPINF1),	4.79591	0.00740167	0.295062
GO:0032490	detection of molecule of bacterial origin	biological_process	5	4	1	1581	15	22747	ENSG00000136869(TLR4),ENSG00000187908(DMBT1),ENSG00000174125(TLR1),ENSG00000129988(LBP),	ENSG00000224389(C4B),	4.79591	0.00348809	0.207635
GO:0036128	CatSper complex	cellular_component	4	3	1	1581	12	22747	ENSG00000152705(CATSPER3),ENSG00000126803(HSPA2),ENSG00000179397(CATSPERE),	ENSG00000099338(CATSPERG),	4.79591	0.00740167	0.295062
GO:0005372	water transmembrane transporter activity	molecular_function	5	0	5	1581	15	22747	-	ENSG00000135517(MIP),ENSG00000161798(AQP5),ENSG00000167580(AQP2),ENSG00000165269(AQP7),ENSG00000165272(AQP3),	4.79591	0.00348809	0.207635
GO:0033690	positive regulation of osteoblast proliferation	biological_process	4	2	2	1581	12	22747	ENSG00000102145(GATA1),ENSG00000125845(BMP2),	ENSG00000173083(HPSE),ENSG00000005513(SOX8),	4.79591	0.00740167	0.295062
GO:0043116	negative regulation of vascular permeability	biological_process	7	4	3	1581	21	22747	ENSG00000186642(PDE2A),ENSG00000079385(CEACAM1),ENSG00000145147(SLIT2),ENSG00000131477(RAMP2),	ENSG00000172572(PDE3A),ENSG00000184113(CLDN5),ENSG00000128271(ADORA2A),	4.79591	0.000791043	0.0941768
GO:0014820	tonic smooth muscle contraction	biological_process	4	2	2	1581	12	22747	ENSG00000144596(GRIP2),ENSG00000151617(EDNRA),	ENSG00000109255(NMU),ENSG00000102468(HTR2A),	4.79591	0.00740167	0.295062
GO:0015671	oxygen transport	biological_process	5	0	5	1581	16	22747	-	ENSG00000284931(AC104389.6),ENSG00000223609(HBD),ENSG00000213931(HBE1),ENSG00000196565(HBG2),ENSG00000213934(HBG1),	4.49617	0.00453427	0.243579
GO:0010838	positive regulation of keratinocyte proliferation	biological_process	5	1	4	1581	16	22747	ENSG00000136869(TLR4),	ENSG00000109321(AREG),ENSG00000092295(TGM1),ENSG00000140285(FGF7),ENSG00000062038(CDH3),	4.49617	0.00453427	0.243579
